# Supplementary material
Source: PubMed Central journal article supplement (PMC7677249)
Supplement: mmc2.pdf [file mmc2.pdf]

# Dye Transport through Bilayers Agrees with Lipid Electropore Molecular Dynamics

Esin B. Sözer,<sup>1</sup> Sourav Haldar,<sup>2</sup> Paul S. Blank,<sup>2</sup> Federica Castellani,<sup>1,3</sup> P. Thomas Vernier,<sup>1,\*</sup> and Joshua Zimmerberg<sup>2,\*</sup>

<sup>1</sup>Frank Reidy Research Center for Bioelectrics, Old Dominion University, Norfolk, Virginia; <sup>2</sup>Section on Integrative Biophysics, Eunice Kennedy Shriver National Institute of Child Health and Human Development, Bethesda, Maryland; and <sup>3</sup>Biomedical Engineering Institute, Frank Batten College of Engineering and Technology, Old Dominion University, Norfolk, Virginia

**ABSTRACT** Although transport of molecules into cells via electroporation is a common biomedical procedure, its protocols are often based on trial and error. Despite a long history of theoretical effort, the underlying mechanisms of cell membrane electroporation are not sufficiently elucidated, in part, because of the number of independent fitting parameters needed to link theory to experiment. Here, we ask if the electroporation behavior of a reduced cell membrane is consistent with time-resolved, atomistic, molecular dynamics (MD) simulations of phospholipid bilayers responding to electric fields. To avoid solvent and tension effects, giant unilamellar vesicles (GUVs) were used, and transport kinetics were measured by the entry of the impermeant fluorescent dye calcein. Because the timescale of electrical pulses needed to restructure bilayers into pores is much shorter than the time resolution of current techniques for membrane transport kinetics measurements, the lifetimes of lipid bilayer electropores were measured using systematic variation of the initial MD simulation conditions, whereas GUV transport kinetics were detected in response to a nanosecond timescale variation in the applied electric pulse lifetimes and interpulse intervals. Molecular transport after GUV permeabilization induced by multiple pulses is additive for interpulse intervals as short as 50 ns but not 5-ns intervals, consistent with the 10–50-ns lifetimes of electropores in MD simulations. Although the results were mostly consistent between GUV and MD simulations, the kinetics of ultrashort, electric-field-induced permeabilization of GUVs were significantly different from published results in cells exposed to ultrashort (6 and 2 ns) electric fields, suggesting that cellular electroporation involves additional structures and processes.

**SIGNIFICANCE** Electroporation models are based on pore formation in simple, homogeneous, lipidic membranes. Lipid electropores can be directly observed only in molecular simulations in which, in the absence of an electric field, the lifetimes of molecular pores are less than 50 ns. This timescale is inconsistent with the permeabilization kinetics and transport events observed in experiments with bilayers (milliseconds) and cells (minutes). We use ultrashort (6- and 2-ns) pulsed electric fields to facilitate dye transport into lipid vesicles and show that the transport is consistent with molecular simulations of electropore lifetimes and inconsistent with cellular electroporation, suggesting that the responses of biological and lipid membranes differ.

## INTRODUCTION

Reversible electropermeabilization (electroporation) is widely used in gene and drug delivery, gene editing, and electrofusion, but the structures and mechanisms associ-

ated with the electrical disruption of biological membranes have not been established conclusively despite decades of study (1–7). Early models of pore formation based on the interplay of surface and line tensions around a membrane opening (8,9) were validated using planar lipid bilayer conductance data (3,10,11). In this theoretical framework, transmembrane potential ( $V_m$ ) lowers the energy ( $W$ ) required for the formation of a hydrophilic pore of radius  $r$ :

$$W = 2\pi\gamma r - \pi\sigma r^2 - CV_m^2 r^2, \quad (1)$$

where  $\gamma$  is the line tension,  $\sigma$  is the surface tension, and  $C$  is a constant (3,8,9). This formalism was applied to

Submitted March 16, 2020, and accepted for publication September 22, 2020.

\*Correspondence: [pvernier@odu.edu](mailto:pvernier@odu.edu) or [zimmerbj@mail.nih.gov](mailto:zimmerbj@mail.nih.gov)

Esin B. Sözer and Sourav Haldar contributed equally to this work.

Sourav Haldar's present address is Department of Biochemistry and Bioinformatics, GITAM Institute of Science, GITAM (Deemed to be University) Visakhapatnam-530045, Andhra Pradesh, India

Editor: Rumiana Dimova.

<https://doi.org/10.1016/j.bpj.2020.09.028>

© 2020

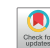

descriptions of electroporation-based transport of molecules into cells and has become the “standard model” of electroporation (12–14).

The “standard model” of electroporation predicts the formation of populations of hydrophilic pores within a few nanoseconds after the pore formation barrier is overcome, with a concomitant increase in membrane conductance and a drop in transmembrane potential to near zero. The evolution of pore populations during application of a porating electric field is also described by this model as is the annihilation of the pores after the end of the porating electric pulse. Because the various implementations of the standard model are empirical with many fitting parameters, they can fit the results of experiments already performed, but they cannot predict outcomes or reveal underlying molecular mechanisms.

Molecular dynamics (MD) simulations provide physics-anchored reference points for the calculated behavior of electrically stressed lipid bilayers (the simplest biological membranes). MD simulations show how applied electric fields stabilize random incursions of water into the membrane interior and how lipid pores form within nanoseconds as phospholipids reorganize around these water bridges (15–18). Annihilation of lipid electropores takes 10–100 times longer than pore creation (17).

Cellular electroporation phenomena that are not predicted by standard or molecular models include persistent permeabilization (19–22), electrosensitization (increased effect with increased delay between pulses) (23), cell size dependence of electropore permeabilization (24), complex molecule-specific transport patterns (5,25,26), maintenance or recovery of post-exposure membrane potential (27), and nanosecond bipolar pulse cancellation (the cancellation of the effects of the first electric pulse by a second electric pulse of the opposite polarity) (28,29).

Experiments with purely lipidic systems are essential for understanding how the lipid components of the cell membrane interact with the electric field and therefore for interpreting the role of nonlipid components of the plasma membrane or downstream biological processes, which are critical to the development of predictive models of electroporation. Early work identified key aspects of permeabilizing electrical stress, such as the relation between lipid composition and reversibility of pore formation (2), critical membrane potentials for permeabilization (2,4), pore energies and lifetimes (3,7,10,11), formation of macropores (30), and localization of lipid loss after electric field exposure (31–33). Experimentally, the existence and lifetime of membrane electropores can be observed only indirectly, for example, in measurements of transport. Experimental validation of the nanosecond-lifetime pore populations observed in MD simulations is constrained by time-resolution limits on data acquisition.

Most reports of nanosecond electric field effects on biomembranes, like those in MD simulations, are based on

in vitro or in vivo permeabilization of cells or tissues, which introduces the complexities of cell membranes and cellular physiology (19–23,25–29). A few studies have explored nanosecond-pulsed, electric-field-induced transport across artificial membranes or lipid vesicles (34–36), but none measured transport kinetics or pore lifetimes after nanosecond pulse permeabilization of lipid membranes (37). Moreover, previous reports of simulated lipid electropore lifetimes (15,16,38,39) have been based on small sample sizes with pores formed under arbitrary conditions and of arbitrary sizes.

Here, we experimentally measure the kinetics of calcein transport into giant unilamellar vesicles (GUVs) exposed to ultrashort electric pulses (2 and 6 ns) and, for the first time, to our knowledge, extract simulated electropore lifetimes using sets of pores systematically stabilized to specific sizes before electric field removal (40). The experimental time-resolution limitation is addressed by using electric pulses separated by only a 50-ns interval, permitting the first, to our knowledge, experimental analysis of electropore lifetime on the nanosecond timescale. Consistent with molecular simulations, a large fraction of the calcein-permeant pores formed under these exposure conditions closed within 50 ns. The time course of calcein transport into GUVs is transient and different from the persistent electropore permeabilization seen in cells under the same exposure conditions.

## MATERIALS AND METHODS

### GUVs

Pure 1-palmitoyl-2-oleoyl-*sn*-glycero-3-phosphocholine (POPC; Avanti Polar Lipids, Alabaster, Alabama) GUVs containing 200 mM sucrose dissolved in piperazine-*N,N'*-bis(2-ethanesulfonic acid) (PIPES) (1 mM EDTA, 1 mM *N*-(2-Hydroxyethyl)ethylenediamine-*N,N',N'*-triacetic acid (HEDTA), 10 mM PIPES, and 100 mM KCl (pH 7.4)) were prepared with a gel-assisted protocol (41,42) and stained with 1,1'-dioctadecyl-3,3,3',3'-tetramethylindodicarbocyanine, 4-chlorobenzenesulfonate salt (DiD) (Invitrogen, Carlsbad, CA) (43). GUVs were pipetted 15 min before the recording into coverglass chambers (Nunc Lab-Tek II; Thermo Fisher Scientific, Waltham, MA) filled with 200  $\mu$ M calcein (MP Biomedicals, Santa Ana, CA) and 200 mM glucose in PIPES solution in which parallel tungsten-wire electrodes were prepositioned in the chamber well. The calcein concentration was chosen to be below the self-quenching range so that the fluorescence intensity varied linearly with concentration (27).

### Microscopy

Images were acquired on a Zeiss LSM 880 confocal microscope (Oberkochen, Germany) using 63 $\times$ , oil immersion, 1.4 NA objective. The size of the confocal pinhole was set to one Airy disk at 633 nm. Calcein and DiD were excited with 488- and 633-nm lasers, respectively, by alternating every 0.03-ms excitation line scan during raster image formation, and fluorescence was measured (emission bands  $\lambda_{\text{calcein}}$ : 500–561 nm and  $\lambda_{\text{DiD}}$ : 635–735 nm) at a rate of 1 fps using separate acquisitions (tracks) to minimize cross talk.

## Image analysis

Images were analyzed with custom MATLAB (The MathWorks, Natick, MA) scripts that track vesicle regions of interest in each frame as described previously (22). The fluorescence intensity change ( $\Delta F$ ) was calculated by subtracting the mean intravesicular intensity before the application of the pulsed electric field exposure from the intravesicular intensity values measured during the experimental time series. A slow, linear, time-dependent, fluorescence change was observed in unexposed vesicles (sham vesicles) characterized in the mean ( $n = 7$ ), and this linear trend in unexposed vesicle fluorescence was subtracted from all experimental time series. The resulting fluorescence intensity was normalized to extravesicular fluorescence intensity ( $F_e$ ), and the time series data presented as fractional fluorescence change ( $\Delta F(t)/F_e$ ) with time ( $t$ ).

## Pulsed electric field exposure

6 or 2 ns—full width at half maximum—electric pulses from FID GmbH pulse generators (6 ns: FPG 10-10NK, 2 ns: FPG 10-1CN6V2; Burbach, Germany) were delivered to lipid vesicles via parallel tungsten-wire electrodes (22,44) 80  $\mu\text{m}$  apart. Pulse exposures were either unipolar or bipolar with equal positive- and negative-phase amplitudes and were monitored and recorded with an oscilloscope. Typical waveforms are shown in Fig. 1. Electric field amplitudes at the vesicles were computed using COMSOL multiphysics (Stockholm, Sweden) are shown in the Supporting Materials and Methods.

## MD simulations

For MD simulations, we used GROMACS 4.6.6 (45,46) on the Old Dominion University High Performance Computing cluster (<http://www.odu.edu/hpc>) with CHARMM36 lipid topologies and force field parameters ([http://mackerell.umaryland.edu/charmm\\_ff.shtml](http://mackerell.umaryland.edu/charmm_ff.shtml)) (47) and the TIP3P water model (48). The online tool CHARMM-GUI: Membrane Builder was used to create lipid bilayer systems (49). All simulations were carried out under the NPT ensemble with a 2 fs time step. Systems were coupled to a temperature bath at 310 K using the velocity-rescale coupling algorithm (50) and to a pressure bath at 1 bar using the Berendsen algorithm (51) with a relaxation time of 1 ps and compressibility of  $4.5 \times 10^{-5} \text{ bar}^{-1}$  semi-isotropically applied in the normal and in-plane directions relative to the membrane. Bond lengths were constrained using the LINCS algo-

rithm (52) for lipids and SETTLE (53) for water. Short-range electrostatic and Lennard-Jones interactions were cut off at 1.0 nm. Long-range electrostatics were calculated by the PME algorithm (54) with conductive periodic boundary conditions.

## Simulation systems and structures

To lipid bilayer systems containing 128 POPC, 64 in each leaflet, and approximately 12,000 water, we added 22  $\text{K}^+$  and 22  $\text{Cl}^-$  using the GROMACS function “genion.” Box dimensions are approximately  $7 \times 7 \times 11 \text{ nm}$ , and the KCl concentration is  $\sim 125 \text{ mM}$  (based on a volume that excludes the membrane interior and interface in which water density is less than 90% of the bulk water density).

The system was equilibrated for 100 ns until a constant area per lipid was achieved (55). A porating electric field of 250 MV/m was applied along the  $z$  axis (normal to the bilayer plane) following the method used in (56) to induce formation of an electropore through the lipid bilayer. A procedure similar to the one described in (40) was used to produce stable electropores at different stabilizing field amplitudes: 40, 50, and 60 MV/m. Stabilizing fields are used to generate a range of different pore sizes whose exact dimensions are computed later, as described in the next section. Three independent trials were carried out for each stabilizing field value by randomizing velocities after pore formation (GROMACS MDP file: `gen_vel = yes` and `gen-seed = -1`). After 100 ns of stabilization, the electric field was reduced to zero, and the simulations were run for another 100 ns. Periodic boundary conditions can cause artifacts associated with effective electric fields in lipid bilayer systems (39,57), but this should not affect these lifetime measurements, which are carried out on pores after the external electric field is removed.

## Pore radius and pore closure time calculations

Pore geometry was extracted from GROMACS structure (gro) files generated from the simulations every 100 ps and analyzed with custom MATLAB scripts (The MathWorks). Pores were centered in each frame using POPC density files generated with the GROMACS command “`g_density`.” The center of the pore was determined as follows: 1) POPC density versus spatial axes plots are smoothed using a Butterworth low-pass filter generated by the native MATLAB function “`butter`”; 2) the region containing the pore is defined by decreases in POPC density in  $x$ ,  $y$ , and  $z$ . The dip defining the pore is chosen as the region in the density profile that is less

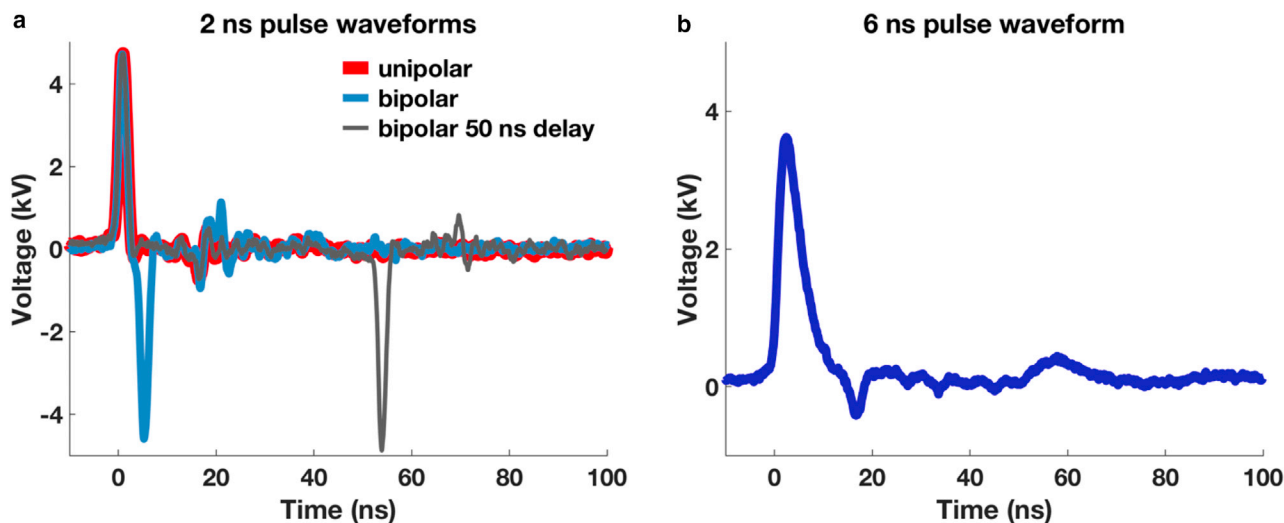

FIGURE 1 Typical electric pulse waveforms recorded during the experiments. (a) Shown is a 6 ns exposure. (b) Shown are 2 ns exposures: unipolar (red), bipolar without any interphase time interval (blue), and bipolar with 50 ns between the phases (gray). To see this figure in color, go online.

than 34% of the full range of densities. The pore center, which is in the middle of this dip region, is placed in the center of the simulation box, translating all atoms in the frame accordingly. After centering the pore, the box is divided into 0.2 nm slices in the  $z$ -direction. Water molecules in each slice are located, and outliers in the  $x$ - and  $y$ -directions are eliminated using the native MATLAB function “isoutlier” (The MathWorks), which defines an outlier as a value that is more than three scaled median absolute deviations away from the median. These outliers represent occasional random water intrusions into the lipid bilayer far from the electropore. Next, the center of each  $z$ -slice in  $x$  and  $y$  is determined using the mean of water oxygen locations, and the distance in the  $x$ - $y$  plane of each water molecule (oxygen atom) from the slice center is calculated. The water-based radius of each slice is defined as the mean plus two standard deviations of this set of distances. This generates a water-column radius versus  $z$ -slice location vector for each frame. The pore radius ( $r_{pore}$ ) in a frame is defined to be the mean water-column radius in the 1-nm-long region around the  $z$ -center of the pore. Pore radius versus time is plotted in Fig. 4 *a* using the mean pore radius of every five frames (500 ps). Error bars show the standard deviation of the pore radius value for the same five frames. Pore closure time is defined as the time of the first of three consecutive frames with  $r_{pore} = 0$ ; that is, three consecutive frames in which five 0.2-nm-thick  $z$ -slices around the box center are water-free.

## RESULTS AND DISCUSSION

### Calcein transport into POPC GUVs after 6 ns electric field exposures

Pure POPC GUVs were prepared using the gel-assisted formation method (41–43), which has several advantages over the electroformation methods (42) commonly used in experimental studies of GUVs in pulsed electric fields (30,32,33,35,36). Disadvantages of GUVs prepared by electroformation include low yield in physiological buffers, heterogeneity in composition and size, and electric-field-induced oxidation of lipids, which causes increased membrane permeability and altered mechanical properties (42). Polyvinyl alcohol (PVA)-gel-assisted swelling is a facile and rapid method for generating GUVs with a wide range of lipid compositions and ionic strengths. A previous version of this method based on agarose-gel produces vesicles with artifacts that may influence experimental results, mainly by encapsulating agarose inside GUVs and influencing the mechanical properties of the membrane, as elucidated previously (58). These issues, however, do not pose a major problem in the PVA-gel-based method because encapsulating PVA inside GUVs is less likely because of the lower solubility of PVA in water compared with agarose (41). The PVA-gel-assisted swelling method was chosen to ensure high enough yield in an approximately physiological salt concentration.

For fluorescence imaging simultaneous with electrical stimulation, DiD-labeled vesicles were positioned between parallel wire electrodes (22) in the field of view. Membrane permeabilization was monitored with calcein, a small (radial cross section 0.58 nm), impermeant, fluorescent molecule that does not interact with lipids during transport across membranes because of its strongly hydrophilic properties (44,59,60). We have previously shown in simula-

tions and experiments that divalent cation dyes such as YO-PRO-1 (Thermo Fisher Scientific) can significantly interact with lipid membranes (22). Calcein, with a valence  $-4$ , has a much higher polar surface area (27,59,60) than YO-PRO-1 (Thermo Fisher Scientific). Previously, calcein did not interact with cell membranes, whereas YO-PRO-1 (Thermo Fisher Scientific) did (22,44).

Confocal fluorescent microscopy of an optical slice through GUVs before electrical stimulation are consistent with a lack of dye in the GUVs interior (Fig. 2 *a*). GUVs did not change in morphology or size during experiments except for a few instances of GUVs bursting at random times (not correlated with electric pulse delivery), which were excluded from data analysis. Because a systematic investigation of all electroporation parameters was not a goal of this study, the pulse exposure parameters were chosen to provide sufficient calcein transport for detection with this imaging system.

Exposure of GUVs to a 1kHz train of 10 electrical pulses of a duration of 6 ns and a field strength of 35 MV/m (pulse train delivery ending in 10 ms) resulted in a stepwise increase of intravesicular calcein fluorescence (Fig. 2 *b*). The increase in fluorescence is approximately proportional to the number of pulses and is additive for successive exposures (Fig. 2 *c*), consistent with the hypothesis that electric fields induce an opening of lipid pores and calcein transport through the pores, most or all of which close during the 1-ms interpulse interval. The intravesicular calcein concentration is  $\sim 1\%$  of the extracellular concentration for 10 pulses and 2% for 20 pulses—2 and 4  $\mu\text{M}$ , respectively. This degree of entry can be described by simple electrodiffusion through nanometer-size, calcein-permeable pores (Supporting Materials and Methods). Consistent with the membrane charging time constant for GUVs ( $\sim 100$  ns) being much longer than the duration of these pulses, the correlation between GUVs size and molecular transport is not positive (Fig. S1) in contrast to a positive correlation observed when long pulse durations (100  $\mu\text{s}$  and 5 ms) (32) are used.

### Calcein transport into POPC GUVs after 2-ns electric field exposures with polarity reversal

GUV permeabilization was tested for sensitivity to direction and sequence of electric field, i.e., exposure to unipolar and bipolar nanosecond pulses. In cells, the transport of small molecules caused by a unipolar pulse is attenuated or cancelled by a closely following pulse of opposite polarity (28,29,44,61–65). In other words, a unipolar pulse is more effective in causing small molecule transport into cells than a bipolar pulse of double the duration. For this set of experiments, we delivered 2 ns bidirectional electric pulses to vesicles; these same doses were used in our earlier report on cells (44). The electrical parameters (40 pulses, 45 MV/m field strength, delivered at a 1 kHz repetition



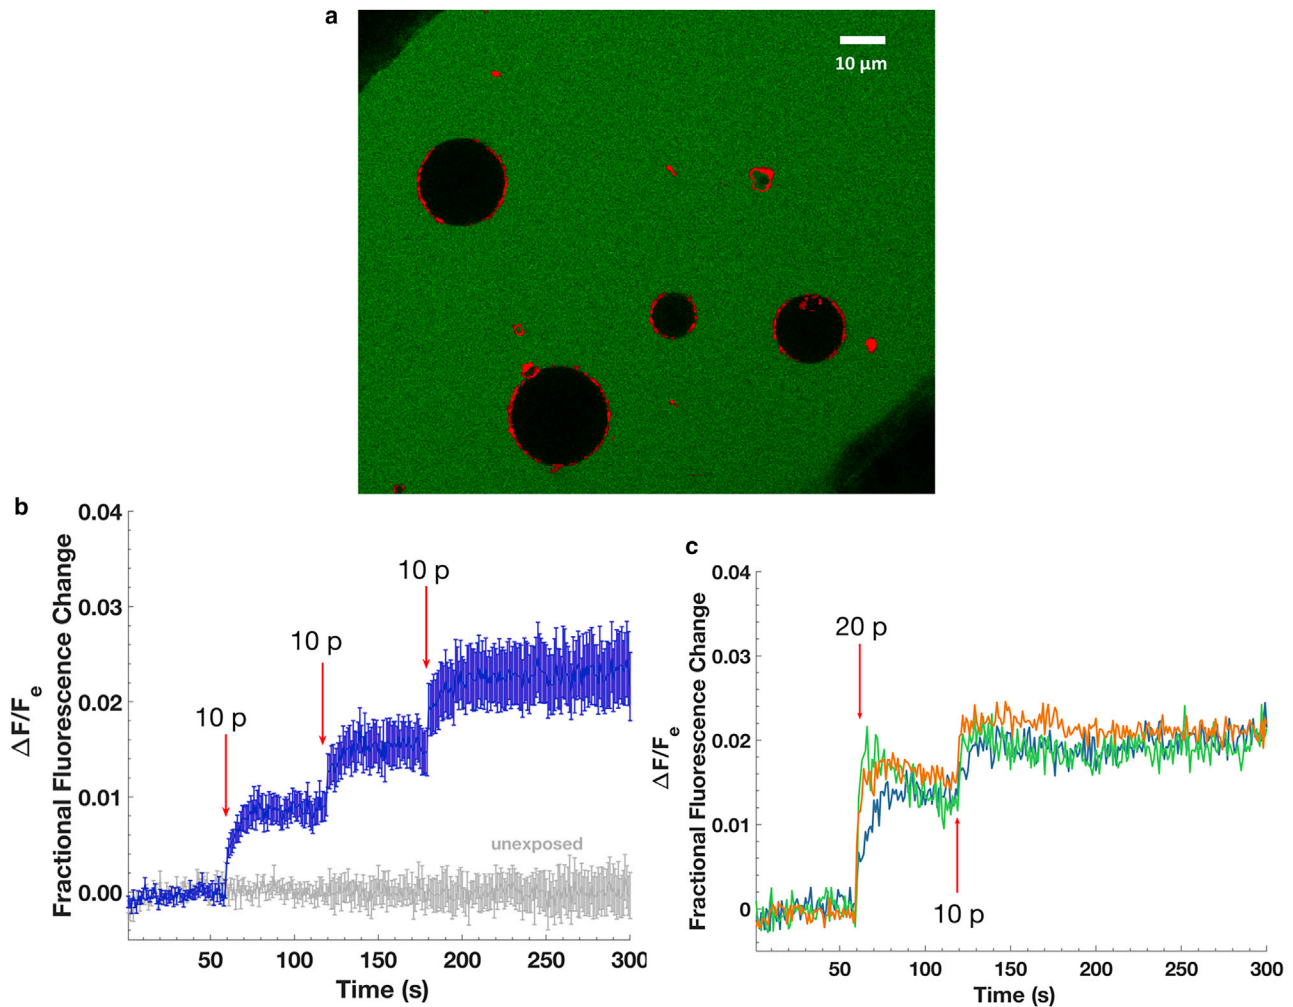

FIGURE 2 (a) Confocal image of four POPC GUVs stained with DiD in 200  $\mu$ M calcein solution at the bottom of a coverglass chamber and between tungsten-wire electrodes before the electric field exposures. Green represents calcein fluorescence, and red represents DiD. (b) Shown is the fractional fluorescence change (ratio of change in intravesicular fluorescence to extravesicular fluorescence) of GUVs exposed to three 1 kHz trains of ten 6 ns electric pulses (at field strengths of 35 MV/m) delivered 1, 2, and 3 minutes into the recording ( $n = 13$ ) or not exposed to the E-field ( $n = 7$ ). Arrows indicate the time of each train of pulses. Error bars are standard error of the mean. (c) Shown are the individual traces of the fractional fluorescence change of three GUVs exposed to two initial 1 kHz trains of 10 pulses separated by 500 ms (total of 20 pulses) and, then after 60 s, exposed to one train of 10 pulses (10 p). In both the 20- and 10-pulse trains, each pulse was 6 ns in duration and 35 MV/m in field amplitude. The imaging rate was 1 fps. To see this figure in color, go online.

rate) were chosen to produce a similar amount of calcein transport as 6 ns pulse trains (Fig. 2 b). 2 ns unipolar and bipolar pulse (2 ns positive and 2 ns negative) exposures, with no interpulse delay (negative pulse immediately follows the positive pulse) result in equal transport of calcein into GUVs, whereas a short delay of 50 ns between the bipolar pulse phases results in at least twice the transport (Fig. 3). That is, for a bipolar pulse with no delay between phases (5 ns interval between the peaks), the negative phase does not significantly affect the calcein permeabilization caused by the preceding positive phase.

This absence of bipolar pulse cancellation with GUVs stands in strong contrast to the cancellation effect observed with cells (44), in which bipolar pulses produce severalfold

less transport than unipolar pulses. Note, if GUV membrane conductivity does not change during the 2 ns of the first bipolar pulse phase, then the second phase of the bipolar pulse should discharge the membrane, resulting in no transport, similar to the bipolar cancellation effect observed with cells (44).

The data of Fig. 3 can be analyzed within the framework of membrane charging (and discharging) in the standard continuum electroporation models (3,10–14). We postulate that the positive applied potential of a bipolar pulse induces a high transmembrane potential, which permeabilizes the membrane and increases the membrane conductance. When the negative applied potential arrives without any delay, because of its high conductance, a high

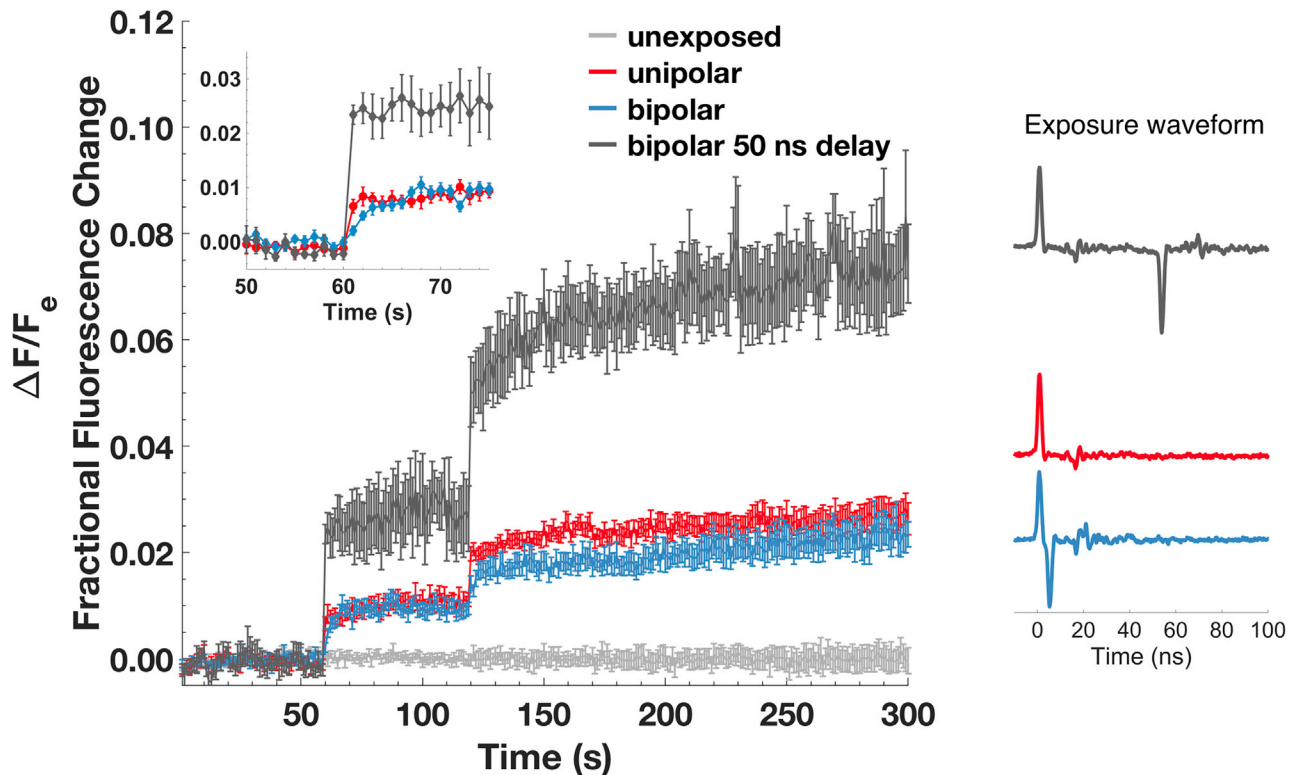

FIGURE 3 Fractional fluorescence change (ratio of change in intravesicular fluorescence to extravesicular fluorescence of calcein transport as a result of exposure to unipolar (red,  $n = 9$ ), bipolar with no interpulse delay (blue,  $n = 10$ ), and bipolar with 50-ns interpulse delay (gray,  $n = 4$ )). Trains of 40 pulses (45 MV/m field strength and 2 ns duration) were delivered at a 1-kHz repetition rate 60 and 120 s into the recording. Error bars show standard error of the mean. (Note that the first and second phases of a 2 ns bipolar pulse are each 2 ns in duration.) The inset shows the transition at the first pulse train exposure. Vesicles that are not exposed to the electric field are also shown ( $n = 7$ ). To see this figure in color, go online.

transmembrane potential cannot develop across the porated GU<sub>V</sub> membrane. Thus, the negative phase of the bipolar pulse cannot significantly change the total transport through existing pores and is not predicted (by the standard models) to significantly affect membrane permeabilization-related transport end points. Because the second, undelayed phase of the bipolar pulse causes no significant change in total calcein transport, the GU<sub>V</sub> membrane must be sufficiently conductive during the second phase of the pulse, and thus, most or all of the conductive electropores are formed within the 2 ns duration of the first phase.

If the second phase of the bipolar pulse is delayed by even 50 ns after the first phase, however, the effect on calcein transport is approximately additive (i.e., the total transport is approximately twice that caused by a unipolar pulse). This is consistent with a membrane that is not significantly conductive after 50 ns when a large fraction of the conductive, calcein-transporting pores due to the first phase closes causes the second, delayed phase to interact with a nonconductive membrane as the first phase did. Note that the total transport ratio for bipolar pulse with 50-ns delay is more than 2 (2.7 and 2.4), which we attribute to the stochastic nature of the measurements that are not resolved because of the limitations in the sample sizes.

### MD simulations of electropore lifetime are consistent with GU<sub>V</sub> permeabilization kinetics

The measurement resolution of GU<sub>V</sub> membrane permeability after electroporation cannot directly detect molecular fluctuations of lipids or electropores lasting tens of nanoseconds. To model the response of lipid molecules to similar electric fields, MD simulations of constructed electropores were studied to assess their behavior after the removal of an external electric field. Pores were generated and stabilized in molecular simulations of POPC bilayers (128 POPC,  $\sim 12,000$  H<sub>2</sub>O, and 22 K<sup>+</sup> and 22 Cl<sup>-</sup>, corresponding to 125 mM KCl, approximating the KCl concentration in the GU<sub>V</sub> suspensions). Pores are created by a porating field of 250 MV/m and then stabilized with sustaining fields of 40, 50, and 60 MV/m (corresponding to pore radii of 1.3, 2.0, and 2.4 nm, respectively) for 100 ns (40), with three simulations for each condition. The initial porating field facilitates creation of electropores with low computational cost and no effect on their physical properties (40). The lower sustaining fields produce stable pores of three different sizes, allowing relationships between pore size and pore lifetime to be determined. The applied field was then reduced to zero, and pore radius

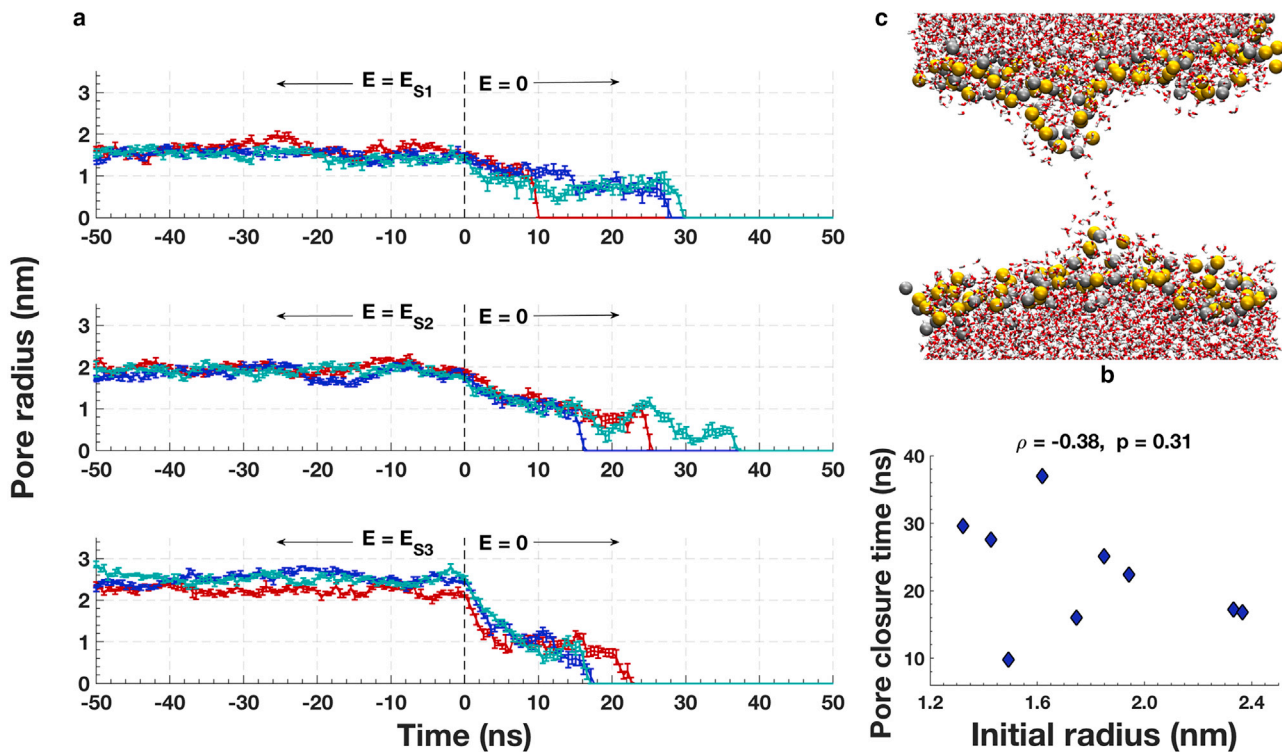

FIGURE 4 (a) Kinetics of pore annihilation for three different pore sizes. Shown are three independent simulations indicated with different colors (*red*, *blue*, and *cyan*) for each pore size, corresponding to each sustaining field ( $E_{S1}$ ,  $E_{S2}$ , and  $E_{S3}$ ), are shown. Error bars indicate standard deviation of radius (Supporting Materials and Methods). (b) Shown is a snapshot of a typical lipid electropore just before final collapse of the membrane-spanning water column (*red* and *white*: water O and H; *gold* and *silver*: P and N of lipid headgroups; lipid tails hidden for clarity). The pore is shown 9.5 ns after removal of  $E_{S1} = 40$  MV/m sustaining field, 0.5 ns before complete closure (simulation plotted in *red* in (a), top plot). (c) Shown is a scatter plot showing a lack of correlation between the initial pore radius (mean of the first 1 ns after the electric field removal) and the pore closure time. To see this figure in color, go online.

was monitored for another 100 ns. Note, the simulation box size (7 nm  $\times$  7 nm  $\times$  11 nm) may have had a small effect on electropore properties for the range of sizes examined, but the results here demonstrate that this did not affect the lifetime of the pores significantly.

Fig. 4 *a* shows the evolution of pore size 50 ns before and after removal of the sustaining electric fields  $E_{S1}$ ,  $E_{S2}$ , and  $E_{S3}$ . Pore radius decreases from a value determined by the sustaining field to  $\sim 1$  nm and then remains in this metastable state for 10–35 ns before the pore closes (Fig. 4 *a*). This state terminates when the pore lipid headgroups separate into two groups, leaving behind a quickly collapsing water bridge (17). A typical electropore just before complete annihilation is shown in Fig. 4 *b*. Snapshots of more frames leading up to the pore collapse can be found in the Supporting Materials and Methods. Pore annihilation time is stochastic and is not correlated with pore size over a range of initial radii of 1.3–2.4 nm (Fig. 4 *c*).

The behavior of these simulated electropores, resulting in lifetimes in the order of tens of nanoseconds after removal of the electric field, is consistent with the experimental measurements of calcein transport. Experimentally, the second phase of a 2 ns bipolar pulse led to a first phase equivalent or higher transport only if there is

sufficient time between the phases (Fig. 3). This time interval agrees with the time needed for molecular bilayers with electropores to return to an unporated state after removal of a permeabilizing electric field. The pore-free, nonconductive state of the membrane makes it possible for induction of a high transmembrane potential, which facilitates pore formation.

### Kinetics of fluorescence change and electrodiffusion of calcein

Interestingly, even though the total transport after a train of unipolar pulses is comparable with that after a train of bipolar pulses with no delay between positive and negative phases, the rise time of calcein influx is slower with bipolar pulse exposures (Fig. 3, *inset*). Additionally, this slower kinetics of the calcein influx is similar to that observed with 6 ns unipolar pulses (Fig. 2 *b*; Fig. S2), unlike 2 ns unipolar or bipolar exposure with 50 ns delay between phases (Fig. 3, *inset*). A bipolar pulse with a 2 ns positive and 2 ns negative phase without any interpulse delay induces a transmembrane potential across the membrane for the duration equal to the total of both phases, 4–5 ns, which is comparable with a 6 ns unipolar exposure (Fig. 1; Fig. S2).

The kinetics of calcein influx after the exposure to a train of 6 ns pulses (Fig. 2 *b*) can be modeled as a fast transition, followed by a slower increase. In the fast process, which has the lifetime characteristics of pores in molecular simulations, there were approximately equal increases in amplitude for each pulse. The slow process amplitude, however, decreases with an increasing time constant with succeeding pulses after the first pulse delivery (Supporting Materials and Methods). We hypothesize that the slower process is due to longer-lasting (seconds) pores, which are more likely to form when the induced membrane potential is sustained for a longer time (i.e., longer pulse durations, 6 and 2 ns bipolar without interpulse interval). This hypothesis also suggests that the increase in the number of longer-lasting (seconds) pores is independent of electric field direction, consistent with the MD simulations, in which field reversal does not affect electropore lifetime. Lipid pores with longer lifetimes are observed experimentally and in simulations when a low membrane potential is present (3,7,40). Moreover, the amplitude of pulse-induced transport after a second bipolar pulse train reaches the level seen after a second unipolar pulse train but more slowly (Fig. 3). This may be an indicator of differences between the persistent pore populations after the two kinds of exposures.

The total amount of calcein transport observed in Fig. 2 *b* with 6 ns pulse trains or in Fig. 3 with 2 ns unipolar (red trace) or bipolar pulses without interpulse delay (blue trace) can be explained by electrodiffusion through electropores with an  $\sim 50$  ns lifetime. These short-lived pores would not be expected to contribute to the slower kinetics observed with 6 ns unipolar (Fig. 2 *b*) and 2 ns bipolar pulses (Fig. 3, blue trace). A very small number of longer-lived pores could be responsible for this transport. For example, 15 pores with

a 1 s lifetime could transport as much as  $10^6$  similar size conductive pores with a 50 ns lifetime (Supporting Materials and Methods). Thus, the slower kinetics observed in longer duration pulse conditions is consistent with the hypothesis that a small number of longer-lived pores facilitates diffusive transport long after the pulse exposure ends. Details of the calculations supporting these statements can be found in the Supporting Materials and Methods.

### Comparison of GUVs and cells

The stepwise intravesicular fluorescence increase after both 2 and 6 ns pulse trains observed with GUVs is not observed with cells after similar exposures (22,27,44). In cells, the intracellular calcein fluorescence increase under similar pulse exposure conditions continues for minutes (27) in contrast with the plateau reached within seconds with GUVs. Fig. 5 compares calcein transport into GUVs and cells during the first 35 s after pulsed electric field exposure. The cell data shown are adapted from earlier experiments with 6 ns pulse trains (27) (10 pulses of 20 MV/m electric field strength delivered at 1 kHz). The inset illustrates the clear plateau after a faster (2 ns pulse exposure) and slower (6 ns pulse exposure) increase in intravesicular calcein fluorescence.

Differences between cells and GUVs are expected because cells are complex, dynamic machines that actively respond to membrane permeabilization (22,66). The set of transport- and recovery-related structures and processes found in electroporeabilized cells—the electroporeome (22)—may include but is not limited to pores prevented from closing by cytoskeletal constraints (67,68) or obstructions (69), field-induced modifications of membrane proteins (70,71), regions of lipid scrambling (72), and

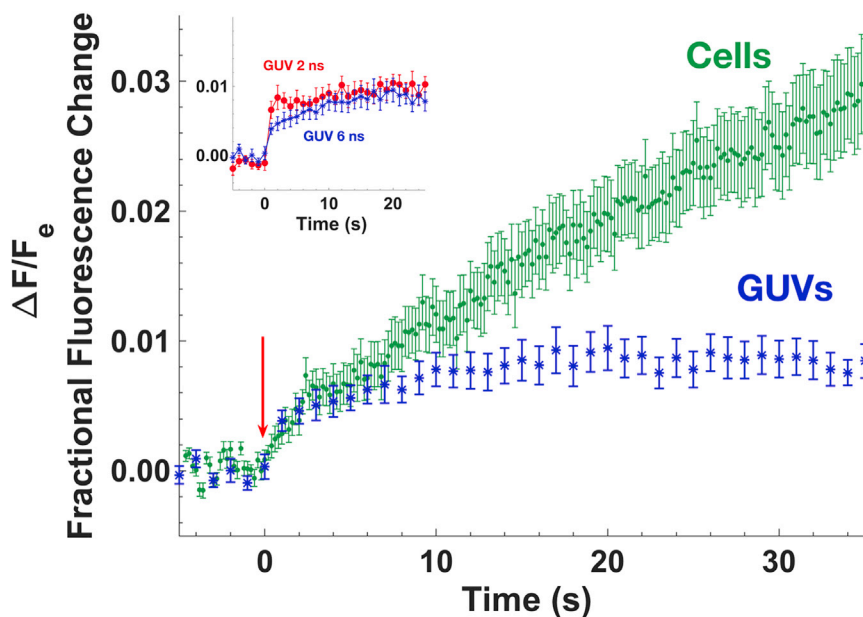

FIGURE 5 Intracellular calcein fluorescence increase of U-937 cells ( $n = 24$ ) exposed to a 1 kHz train of ten 20-MV/m, 6 ns pulses plotted together with the first 30 s after the first exposure of GUVs shown in Fig. 1 *b* (6 ns pulses, 1 kHz train of ten 35 MV/m,  $n = 13$ ). Fractional fluorescence change is the ratio of intracellular or intravesicular fluorescence change to extracellular or extravesicular fluorescence, respectively. For ease of comparison, the exposure time is translated to 0 s for both recordings. Given are a frame rate of 5 fps for cells and of 1 fps for GUVs. Cell electroporeabilization lasts minutes, whereas GUVs electroporeabilization reaches a plateau in seconds. The inset shows the transition kinetics after exposures of 2 ns unipolar (Fig. 2) and 6 ns unipolar (Fig. 1 *b*) of GUVs. Error bars show standard error of the mean. To see this figure in color, go online.



biological responses to disturbance of homeostasis, such as active volume regulation, cell membrane repair, and ATP-dependent pump activity for restoration of ionic imbalance and membrane potential.

## CONCLUSIONS

The experimental data are consistent with the hypothesis that calcein-permeable lipid electropores in GUVs are created within a few nanoseconds and that most are annihilated within a few tens of nanoseconds, consistent with molecular simulations, but in contrast with the typical persistent electroporation (many seconds to minutes) observed in living cells. Furthermore, the magnitudes of the increases in intravesicular dye concentration are much smaller with nanosecond-pulsed electric fields than those observed in the presence of the pore-forming peptide melittin or exposure to influenza virus at a low pH (43). Nanosecond bipolar pulse cancellation (44), a phenomenon recently described in cells, was not observed in GUVs. The absence of persistent electroporation and nanosecond bipolar cancellation of GUVs suggests that the electroporation of cells involves structures and processes that go beyond transport through lipid pores and that models of electroporation must be modified accordingly.

## SUPPORTING MATERIAL

Supporting Material can be found online at <https://doi.org/10.1016/j.bpj.2020.09.028>.

## AUTHOR CONTRIBUTIONS

E.B.S., S.H., P.T.V., and J.Z. designed the research. S.H. prepared the GUVs. E.B.S. and S.H. performed the GUV experiments. F.C. performed the MD simulations. E.B.S. analyzed the experimental and simulation data and generated the figures. P.S.B. generated the analysis of transport kinetics. E.B.S. and P.S.B. did the analytical calculations. P.T.V. supervised the simulations. P.T.V. and J.Z. supervised the experiments. E.B.S. and P.T.V. wrote the manuscript. P.T.V. and J.Z. supervised the whole work. All authors contributed to writing, editing, and revision of the manuscript.

## ACKNOWLEDGMENTS

We thank Dr. Leonid Chernomordik for helpful discussions.

This work was supported in part by the Division of Intramural Research of the NICHD. E.B.S. and P.T.V. were supported by AFOSR MURI grant FA9550-15-1-0517 on “Nanoelectropulse-Induced Electromechanical Signaling and Control of Biological Systems,” administered through Old Dominion.

## REFERENCES

1. Stewart, M. P., R. Langer, and K. F. Jensen. 2018. Intracellular delivery by membrane disruption: mechanisms, strategies, and concepts. *Chem. Rev.* 118:7409–7531.
2. Benz, R., F. Beckers, and U. Zimmermann. 1979. Reversible electrical breakdown of lipid bilayer membranes: a charge-pulse relaxation study. *J. Membr. Biol.* 48:181–204.
3. Abidor, I. G., V. B. Arakelyan, ..., M. R. Tarasevich. 1979. Electric breakdown of bilayer lipid membranes I. The main experimental facts and their qualitative discussion. *Bioelectrochem. Bioenerg.* 6:37–52.
4. Teissie, J., and T. Y. Tsong. 1981. Electric field induced transient pores in phospholipid bilayer vesicles. *Biochemistry.* 20:1548–1554.
5. Tekle, E., R. D. Astumian, and P. B. Chock. 1994. Selective and asymmetric molecular transport across electroporated cell membranes. *Proc. Natl. Acad. Sci. USA.* 91:11512–11516.
6. Teissie, J., M. Golzio, and M. P. Rols. 2005. Mechanisms of cell membrane electroporation: a minireview of our present (lack of?) knowledge. *Biochim. Biophys. Acta.* 1724:270–280.
7. Sengel, J. T., and M. I. Wallace. 2016. Imaging the dynamics of individual electropores. *Proc. Natl. Acad. Sci. USA.* 113:5281–5286.
8. Litster, J. D. 1975. Stability of lipid bilayers and red blood cell membranes. *Phys. Lett. A.* 53:193–194.
9. Taupin, C., M. Dvolaitzky, and C. Sauterey. 1975. Osmotic pressure induced pores in phospholipid vesicles. *Biochemistry.* 14:4771–4775.
10. Chernomordik, L. V., S. I. Sukharev, ..., Y. A. Chizmadzhev. 1983. Breakdown of lipid bilayer membranes in an electric field. *Biochim. Biophys. Acta.* 736:203–213.
11. Glaser, R. W., S. L. Leikin, ..., A. I. Sokirko. 1988. Reversible electrical breakdown of lipid bilayers: formation and evolution of pores. *Biochim. Biophys. Acta.* 940:275–287.
12. DeBruin, K. A., and W. Krassowska. 1999. Modeling electroporation in a single cell. I. Effects of field strength and rest potential. *Biophys. J.* 77:1213–1224.
13. Weaver, J. C., and Y. A. Chizmadzhev. 1996. Theory of electroporation: a review. *Bioelectrochem. Bioenerg.* 41:135–160.
14. Son, R. S., K. C. Smith, ..., J. C. Weaver. 2014. Basic features of a cell electroporation model: illustrative behavior for two very different pulses. *J. Membr. Biol.* 247:1209–1228.
15. Tieleman, D. P. 2004. The molecular basis of electroporation. *BMC Biochem.* 5:10.
16. Tarek, M. 2005. Membrane electroporation: a molecular dynamics simulation. *Biophys. J.* 88:4045–4053.
17. Levine, Z. A., and P. T. Vernier. 2010. Life cycle of an electropore: field-dependent and field-independent steps in pore creation and annihilation. *J. Membr. Biol.* 236:27–36.
18. Tokman, M., J. H. Lee, ..., P. T. Vernier. 2013. Electric field-driven water dipoles: nanoscale architecture of electroporation. *PLoS One.* 8:e61111.
19. Vernier, P. T., Y. Sun, and M. A. Gundersen. 2006. Nanoelectropulse-driven membrane perturbation and small molecule permeabilization. *BMC Cell Biol.* 7:37.
20. Pakhomov, A. G., J. F. Kolb, ..., K. H. Schoenbach. 2007. Long-lasting plasma membrane permeabilization in mammalian cells by nanosecond pulsed electric field (nsPEF). *Bioelectromagnetics.* 28:655–663.
21. Romeo, S., Y.-H. Wu, ..., P. T. Vernier. 2013. Water influx and cell swelling after nanosecond electroporation. *Biochim. Biophys. Acta.* 1828:1715–1722.
22. Sözer, E. B., Z. A. Levine, and P. T. Vernier. 2017. Quantitative limits on small molecule transport via the electropore - measuring and modeling single nanosecond perturbations. *Sci. Rep.* 7:57.
23. Pakhomova, O. N., B. W. Gregory, ..., A. G. Pakhomov. 2011. Electroporation-induced electrosensitization. *PLoS One.* 6:e17100.
24. Henslee, B. E., A. Morss, ..., L. J. Lee. 2011. Electroporation dependence on cell size: optical tweezers study. *Anal. Chem.* 83:3998–4003.
25. Steelman, Z. A., G. P. Tolstykh, ..., B. L. Iby. 2016. Cellular response to high pulse repetition rate nanosecond pulses varies with fluorescent marker identity. *Biochem. Biophys. Res. Commun.* 478:1261–1267.

26. Sözer, E. B., C. F. Pocetti, and P. T. Vernier. 2018. Asymmetric patterns of small molecule transport after nanosecond and microsecond electroporation. *J. Membr. Biol.* 251:197–210.
27. Sözer, E. B., C. F. Pocetti, and P. T. Vernier. 2018. Transport of charged small molecules after electroporation - drift and diffusion. *BMC Biophys.* 11:4.
28. Pakhomov, A. G., I. Semenov, ..., B. L. Ibey. 2014. Cancellation of cellular responses to nanosecond electroporation by reversing the stimulus polarity. *Cell. Mol. Life Sci.* 71:4431–4441.
29. Pakhomov, A. G., S. Grigoryev, ..., S. Xiao. 2018. The second phase of bipolar, nanosecond-range electric pulses determines the electroporation efficiency. *Bioelectrochemistry.* 122:123–133.
30. Riske, K. A., and R. Dimova. 2005. Electro-deformation and poration of giant vesicles viewed with high temporal resolution. *Biophys. J.* 88:1143–1155.
31. Tekle, E., R. D. Astumian, ..., P. B. Chock. 2001. Asymmetric pore distribution and loss of membrane lipid in electroporated DOPC vesicles. *Biophys. J.* 81:960–968.
32. Mauroy, C., T. Portet, ..., M.-P. Rols. 2012. Giant lipid vesicles under electric field pulses assessed by non invasive imaging. *Bioelectrochemistry.* 87:253–259.
33. Portet, T., C. Favard, ..., M. P. Rols. 2011. Insights into the mechanisms of electromediated gene delivery and application to the loading of giant vesicles with negatively charged macromolecules. *Soft Matter.* 7:3872–3881.
34. Tekle, E., H. Oubrahim, ..., P. B. Chock. 2005. Selective field effects on intracellular vacuoles and vesicle membranes with nanosecond electric pulses. *Biophys. J.* 89:274–284.
35. Breton, M., L. Delemotte, ..., M. Tarek. 2012. Transport of siRNA through lipid membranes driven by nanosecond electric pulses: an experimental and computational study. *J. Am. Chem. Soc.* 134:13938–13941.
36. Salomone, F., M. Breton, ..., F. Beltram. 2014. High-yield nontoxic gene transfer through conjugation of the CM<sub>18</sub>-Tat<sub>11</sub> chimeric peptide with nanosecond electric pulses. *Mol. Pharm.* 11:2466–2474.
37. Perrier, D. L., L. Rems, and P. E. Boukany. 2017. Lipid vesicles in pulsed electric fields: fundamental principles of the membrane response and its biomedical applications. *Adv. Colloid Interface Sci.* 249:248–271.
38. Levine, Z. A., and P. T. Vernier. 2012. Calcium and phosphatidylserine inhibit lipid electropore formation and reduce pore lifetime. *J. Membr. Biol.* 245:599–610.
39. Böckmann, R. A., B. L. de Groot, ..., H. Grubmüller. 2008. Kinetics, statistics, and energetics of lipid membrane electroporation studied by molecular dynamics simulations. *Biophys. J.* 95:1837–1850.
40. Fernández, M. L., M. Risk, ..., P. T. Vernier. 2012. Size-controlled nanopores in lipid membranes with stabilizing electric fields. *Biochem. Biophys. Res. Commun.* 423:325–330.
41. Weinberger, A., F.-C. Tsai, ..., C. Marques. 2013. Gel-assisted formation of giant unilamellar vesicles. *Biophys. J.* 105:154–164.
42. Stein, H., S. Spindler, ..., V. Sandoghdar. 2017. Production of isolated giant unilamellar vesicles under high salt concentrations. *Front. Physiol.* 8:63.
43. Haldar, S., E. Mekhedov, ..., J. Zimmerberg. 2018. Lipid-dependence of target membrane stability during influenza viral fusion. *J. Cell Sci.* 132:jcs218321.
44. Sözer, E. B., and P. T. Vernier. 2019. Modulation of biological responses to 2 ns electrical stimuli by field reversal. *Biochim. Biophys. Acta Biomembr.* 1861:1228–1239.
45. Van Der Spoel, D., E. Lindahl, ..., H. J. C. Berendsen. 2005. GROMACS: fast, flexible, and free. *J. Comput. Chem.* 26:1701–1718.
46. van Der Spoel, D., E. Lindahl, B. Hess; the GROMACS Development Team. 2014. GROMACS user manual, version 4.6.6 [www.gromacs.org](http://www.gromacs.org).
47. Klauda, J. B., R. M. Venable, ..., R. W. Pastor. 2010. Update of the CHARMM all-atom additive force field for lipids: validation on six lipid types. *J. Phys. Chem. B.* 114:7830–7843.
48. Jorgensen, W. L., J. Chandrasekhar, ..., M. L. Klein. 1983. Comparison of simple potential functions for simulating liquid water. *J. Chem. Phys.* 79:926–935.
49. Jo, S., T. Kim, ..., W. Im. 2008. CHARMM-GUI: a web-based graphical user interface for CHARMM. *J. Comput. Chem.* 29:1859–1865.
50. Bussi, G., D. Donadio, and M. Parrinello. 2007. Canonical sampling through velocity rescaling. *J. Chem. Phys.* 126:014101.
51. Berendsen, H. J. C., J. P. M. Postma, ..., J. R. Haak. 1984. Molecular dynamics with coupling to an external bath. *J. Chem. Phys.* 81:3684–3690.
52. Hess, B., H. Bekker, ..., J. G. E. M. Fraaije. 1997. LINCS: a linear constraint solver for molecular simulations. *J. Comput. Chem.* 18:1463–1472.
53. Miyamoto, S., and P. A. Kollman. 1992. Settle: an analytical version of the SHAKE and RATTLE algorithm for rigid water models. *J. Comput. Chem.* 13:952–962.
54. Essmann, U., L. Perera, ..., L. G. Pedersen. 1995. A smooth particle mesh Ewald method. *J. Chem. Phys.* 103:8577–8593.
55. Vernier, P. T., M. J. Ziegler, and R. Dimova. 2009. Calcium binding and head group dipole angle in phosphatidylserine-phosphatidylcholine bilayers. *Langmuir.* 25:1020–1027.
56. Ziegler, M. J., and P. T. Vernier. 2008. Interface water dynamics and porating electric fields for phospholipid bilayers. *J. Phys. Chem. B.* 112:13588–13596.
57. Gumbart, J., F. Khalili-Araghi, ..., B. Roux. 2012. Constant electric field simulations of the membrane potential illustrated with simple systems. *Biochim. Biophys. Acta.* 1818:294–302.
58. Lira, R. B., R. Dimova, and K. A. Riske. 2014. Giant unilamellar vesicles formed by hybrid films of agarose and lipids display altered mechanical properties. *Biophys. J.* 107:1609–1619.
59. Ertl, P., B. Rohde, and P. Selzer. 2000. Fast calculation of molecular polar surface area as a sum of fragment-based contributions and its application to the prediction of drug transport properties. *J. Med. Chem.* 43:3714–3717.
60. Maherani, B., E. Arab-Tehrany, ..., M. Linder. 2013. Calcein release behavior from liposomal bilayer; influence of physicochemical/mechanical/structural properties of lipids. *Biochimie.* 95:2018–2033.
61. Ibey, B. L., J. C. Ullery, ..., A. G. Pakhomov. 2014. Bipolar nanosecond electric pulses are less efficient at electroporation and killing cells than monopolar pulses. *Biochem. Biophys. Res. Commun.* 443:568–573.
62. Gianulis, E. C., J. Lee, ..., A. G. Pakhomov. 2015. Electroporation of mammalian cells by nanosecond electric field oscillations and its inhibition by the electric field reversal. *Sci. Rep.* 5:13818.
63. Valdez, C. M., R. A. Barnes, Jr., ..., B. L. Ibey. 2017. Asymmetrical bipolar nanosecond electric pulse widths modify bipolar cancellation. *Sci. Rep.* 7:16372.
64. Casciola, M., S. Xiao, ..., A. G. Pakhomov. 2019. Cancellation of nerve excitation by the reversal of nanosecond stimulus polarity and its relevance to the gating time of sodium channels. *Cell. Mol. Life Sci.* 76:4539–4550.
65. Gianulis, E. C., M. Casciola, ..., A. G. Pakhomov. 2019. Selective distant electrostimulation by synchronized bipolar nanosecond pulses. *Sci. Rep.* 9:13116.
66. Sabri, N., B. Pelissier, and J. Teissié. 1996. Electroporation of intact maize cells induces an oxidative stress. *Eur. J. Biochem.* 238:737–743.
67. Rols, M. P., and J. Teissié. 1992. Experimental evidence for the involvement of the cytoskeleton in mammalian cell electroporation. *Biochim. Biophys. Acta.* 1111:45–50.
68. Perrier, D. L., A. Vahid, ..., P. E. Boukany. 2019. Response of an actin network in vesicles under electric pulses. *Sci. Rep.* 9:8151.

69. Weaver, J. C. 1993. Electroporation: a general phenomenon for manipulating cells and tissues. *J. Cell. Biochem.* 51:426–435.
70. Chen, W., Y. Han, ..., D. Astumian. 1998. Electric field-induced functional reductions in the K<sup>+</sup> channels mainly resulted from supramembrane potential-mediated electroconformational changes. *Biophys. J.* 75:196–206.
71. Rems, L., M. A. Kasimova, ..., L. Delemotte. 2020. Pulsed electric fields can create pores in the voltage sensors of voltage-gated ion channels. *Biophys. J.* 119:190–205.
72. Vernier, P. T., Y. Sun, ..., M. A. Gundersen. 2004. Nanosecond pulsed electric fields perturb membrane phospholipids in T lymphoblasts. *FEBS Lett.* 572:103–108.

**Biophysical Journal, Volume 119**

**Supplemental Information**

**Dye Transport through Bilayers Agrees with Lipid Electropore Molecular Dynamics**

**Esin B. Sözer, Sourav Haldar, Paul S. Blank, Federica Castellani, P. Thomas Vernier, and Joshua Zimmerberg**



# Dye transport through bilayers agrees with lipid electropore molecular dynamics

Esin B. Sözer<sup>1,\*</sup>, Sourav Haldar<sup>2,3,\*</sup>, Paul S. Blank<sup>2</sup>, Federica Castellani<sup>1,4</sup>, P. Thomas Vernier<sup>1†</sup> and Joshua Zimmerberg<sup>2‡</sup>

<sup>1</sup>Frank Reidy Research Center for Bioelectrics, Old Dominion University, Norfolk, VA 23508, USA

<sup>2</sup>Section on Integrative Biophysics, Eunice Kennedy Shriver National Institute of Child Health and Human Development, Bethesda, MD 20892, USA

<sup>3</sup>Current address: Department of Biochemistry and Bioinformatics, GITAM Institute of Science, GITAM (Deemed to be University), Visakhapatnam-530045, Andhra Pradesh, India

<sup>4</sup>Biomedical Engineering Institute, Frank Batten College of Engineering and Technology Old Dominion University, Norfolk, VA 23529, USA

\*These authors equally contributed to this work.

†Corresponding author: pvernier@odu.edu (PTV)

‡Corresponding author: zimmerbj@mail.nih.gov (JZ)

## Supplementary Material

### Experimental Methods

**Electric field exposure.** We used 100  $\mu\text{m}$  diameter tungsten wire electrodes similar to our prior exposure system described earlier (Sözer et al. 2017, 2018, 2019). The separation between the electrodes was approximately 80  $\mu\text{m}$ .

The calculated electric field values for a 1 kV potential difference between the electrodes placed on top of a glass coverglass are shown in Figure S1. The electric field value right above the glass surface in the mid-region of the electrodes is 10 MV/m, which will proportionally scale with higher potential differences. In our case 4.5 kV pulse for 2 ns pulse corresponds to 45 MV/m, and 3.5 kV pulse for 6 ns pulse corresponds to 35 MV/m.

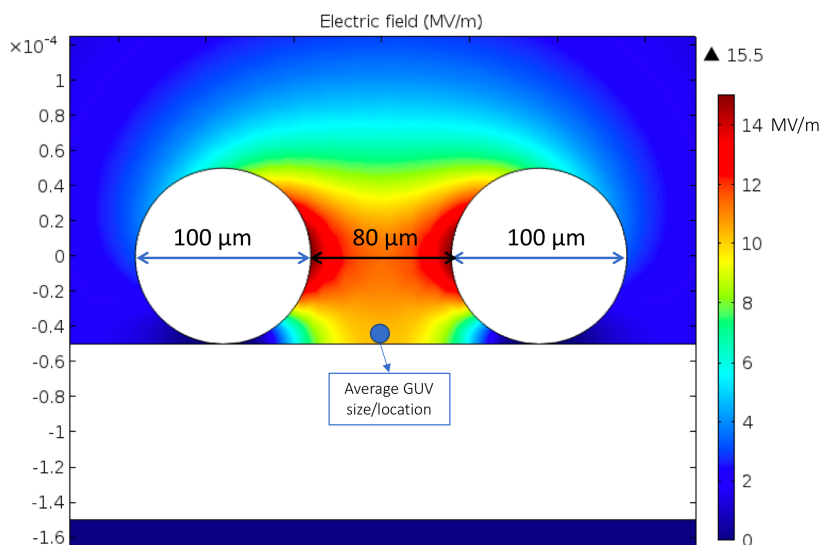

Figure S1 Electric field calculations between two tungsten wire electrodes with a potential difference of 1 kV.

**GUV preparation.** GUVs were prepared by the PVA-gel swelling method as described previously (Weinberger et al., 2013). Briefly, to prepare GUVs required, an amount of POPC drawn from a stock solution was diluted into 200  $\mu\text{l}$  of  $\text{CHCl}_3$  to a concentration of 3.94 mM (3.35 mg/ml). To this, 10  $\mu\text{l}$  of DiD (Invitrogen) was added (from a stock of 5  $\mu\text{M}$  in DMSO) and vortexed for  $\sim 2$  min. This lipid mixture in  $\text{CHCl}_3$  was then deposited on a plasma-cleaned (using a Harrick plasma cleaner, Ithaca, NY) microscope coverglass, coated with 5% (w/w in  $\text{ddH}_2\text{O}$ ) polyvinylalcohol (Merck Millipore). The organic solvent was evaporated by a gentle stream of nitrogen and followed by storing in high vacuum for one hour. The coverglass with the lipid film on, was then transferred to a 30-mm tissue culture dish. 500  $\mu\text{l}$  of PIPES buffer (1 mM EDTA, 1 mM HEDTA, 10 mM PIPES, 100 mM KCl, pH 7.4 with  $\sim 200$  mM sucrose) was added covering the entire surface of the coverglass and allowed to incubate for 30 minutes in the dark. After 30 minutes, the GUVs were harvested by gently tapping the sides of the dish, then gently drawing out using a 1 ml pipette without touching the surface and transferring them to a 1.5 ml micro-centrifuge tube. The GUV suspension was stored at  $4^\circ\text{C}$  until further use. The total lipid concentration of GUV suspension was 1.35 mg/ml (1.58 mM). Typically, GUVs were made the same day as the experiment.

For imaging, an aliquot of GUV suspension was added to an osmotically balanced glucose solution (1 mM EDTA, 1 mM HEDTA, 10 mM PIPES, 100 mM KCl, pH 7.4 with  $\sim 200$  mM glucose) to allow the GUVs to settle at the bottom of the imaging chamber.

### Vesicle size correlation with fractional fluorescence change

Bioelectromagnetic theory predicts that a GUV (a spherical dielectric shell) in a uniform electric field in a conductive medium will develop a peak induced membrane potential proportional to its radius (Pauly and Schwan 1959).

$$\Delta\psi_m = \frac{3}{2} E_0 r (1 - e^{-t/\tau_m}) \quad (\text{S1})$$

where  $\psi_m$  is the membrane potential,  $t$  is the duration of the electric field exposure, and  $\tau_m$  is the membrane charging time constant. However, the positive correlation between vesicle radius and calcein fluorescence increase predicted by classical electroporation theory is not seen in our data

(Figure S2), in contrast to experiments where longer pulse durations were used (Mauroy *et al.* 2012). This size-independence of membrane permeabilization is also seen in cells, when the pulse duration is much shorter than  $\tau_m$  (approximately 100 ns in the current set of experiments). Mathematically, this comes from the linear approximation of the exponential term in equation S1 for small  $t/\tau_m$ , since  $\tau_m$  is directly proportional to vesicle size (Sözer *et al.* 2017, Stewart *et al.* 2004). The negative correlation of vesicle size and fractional fluorescence change shown in Figure S2a is not significant when a smaller time range before and after pulse delivery is used to calculate fractional fluorescence change (Figure S2b and c). One interpretation is that a rapidly opening and closing pore population forms independent of vesicle size, causing an immediate fluorescence change at pulse delivery, and that the formation of longer-lasting (seconds) pores is negatively correlated with vesicle size. The reason for this dependence needs further investigation with a larger sample size. Note that we did not detect a change in vesicle size during our measurements. Nevertheless, the correlation calculations were done for the total transport after the very first pulse train delivery in Figure 2b, and the corresponding vesicle sizes were measured at the frame right before the pulse delivery, since we can only look for a correlation of the vesicle size with the transport at the instance of interaction with the external electric field.

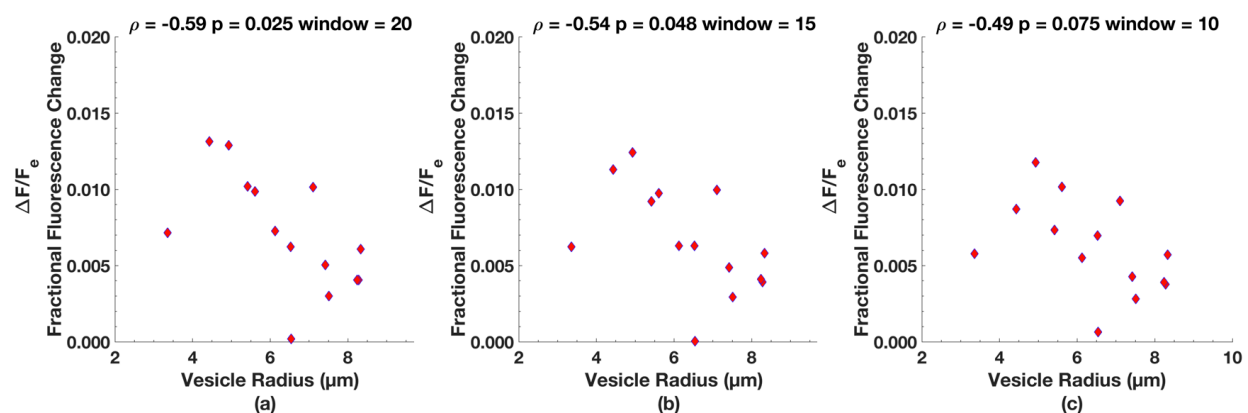

Figure S2 Vesicle size dependence of fractional fluorescence change calculated using window size (a) 20 (b) 15 and (c) 10 around first pulse train delivery.

### Kinetics of fluorescence change and electrodiffusion of calcein

From the kinetics presented in Figure 2b, we wonder if 6 ns (*unipolar*) pulses form some longer lifetime pores (seconds) in the membrane in addition to a much larger number of fast-closing (tens of nanoseconds) pores. Longer lifetime pores can also explain the slower rise time of the responses to 2 ns bipolar pulses without any interpulse delay, which induces a high transmembrane potential across the membrane for 4-5 ns, resulting in the formation of a population of longer-lifetime pores similar to those produced by the unipolar 6 ns pulse exposures. Lipid pores with longer lifetimes are observed experimentally and in simulations when a low membrane potential is present (Abidor *et al.* 1979, Sengel and Wallace 2016, Fernández *et al.* 2012). This hypothesis suggests that longer duration pulses are more likely to form longer lifetime pores. See Figure S3 overlays of 6 ns unipolar and 2 ns bipolar waveforms and calcein uptake kinetics. A small population of longer lifetime pores with bipolar pulses without any interpulse delay is also consistent with MD simulations in which the electric field direction is reversed after pore formation. Field reversal did not affect pore size or lifetime. The pore continues to evolve as if the change in the direction of

the field did not happen. The longer lifetime pore population could also lead to a change in the system that affects response to subsequent pulse trains.

In contrast, with 2 ns unipolar pulses in Figure 3 (either single or with 50 ns interpulse delay), the contribution of longer lifetime pores in the pore population is lower, thus we see sharp increases (faster than our recording speed of 1 fps) in calcein fluorescence intensity.

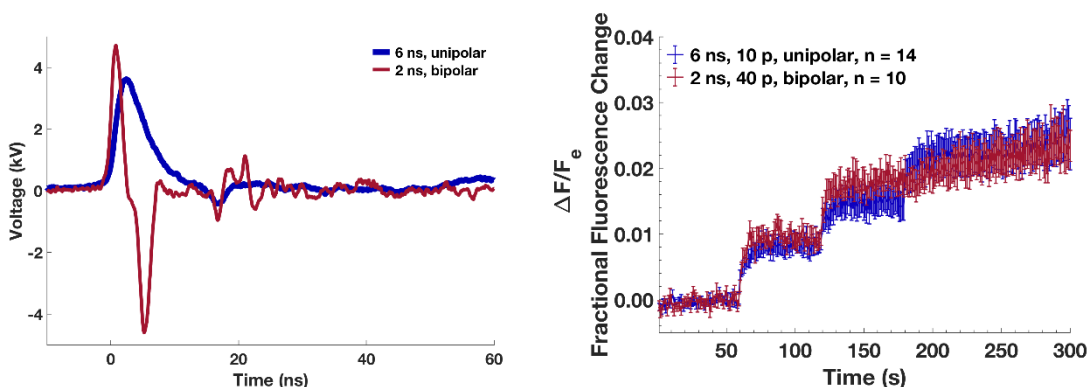

Figure S3. Left: overlay of 2 ns bipolar pulse with no interpulse delay and 6 ns unipolar pulse. Right: calcein uptake kinetics after exposure to two different pulse trains, consisting of the pulses shown on the left panel. Maroon: a train of 40 bipolar pulses (45 MV/m, 2 ns, 1 kHz repetition rate) were delivered at 60 and 120 seconds into the recording (also shown in the main manuscript figure 3). Blue: a train of ten unipolar pulses (35 MV/m, 6 ns, 1 kHz repetition rate) delivered at 60, 120 and 180 seconds into the recording (also shown in the main manuscript figure 2b).

The kinetic changes following pulse exposure to a train of ten pulses of 6 ns duration and field strength of 35 MV/m (Figure 2b) can be modeled as an “instantaneous” jump (unresolvable at 1 Hz imaging) at the start of a pulse sequence followed by a kinetic term with a single time constant. For the data presented in Figure 2b, both piecewise and global fitting support the hypothesis that the instantaneous jump, the contribution of the kinetic term, and the time constant are the same. The basic model is

$$IJ + A (1 - \exp(-t/\tau)) \quad (S2)$$

where  $IJ$  is the “instantaneous” change measured in the first image frame,  $A$  is the amplitude associated with the kinetics resolved in subsequent image frames, and  $\tau$  is the time constant. Table S1 summarizes the fitted data obtained using three parameter, piece-wise fitting, after subtracting the starting plateau value, and Figure S4 shows the data with the fit. Regression of all parameter values, as a function of pulse sequence also indicates no linear dependence (slope not statistically different from 0) supporting the hypothesis that each pulse sequence, on average, is an independent realization of the underlying creation of pores with approximately half of the signal change due to electrophoretic transport (drift) through short lived pores and the other half due to diffusive transport through longer lived pores.



Table S1 Three parameter piece-wise fitting of kinetics of fluorescence change after 6 ns, 35 MV/m pulse train (Fig 1b main manuscript) to equation S2

| $\Delta F/F_e$              | Pulse Train |       |       |
|-----------------------------|-------------|-------|-------|
|                             | 1           | 2     | 3     |
| Amplitude ( $A$ )           | 0.005       | 0.003 | 0.004 |
| Instantaneous Jump ( $IJ$ ) | 0.004       | 0.004 | 0.004 |
| Total Change                | 0.009       | 0.007 | 0.007 |
| 95% Confidence              | 0.002       | 0.002 | 0.001 |
| $\tau$ (s)                  | 7.7         | 9.8   | 12.0  |
| 95% Confidence              | 3.5         | 7.3   | 5.2   |

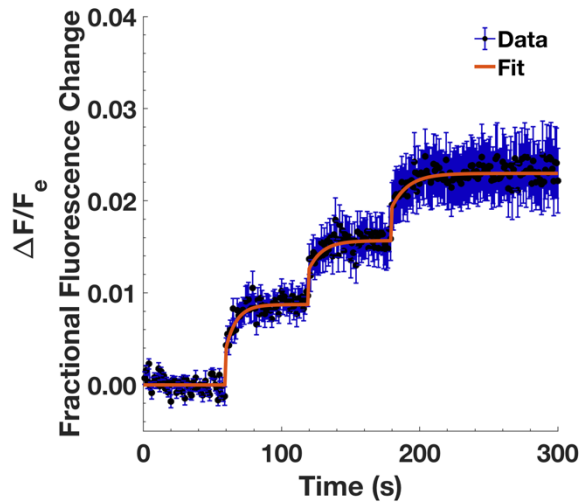

Figure S4. Three parameter piece-wise fitting of data from main manuscript Figure 2b where GUVs exposed to three 1 kHz trains of ten 6 ns electric pulses at field strengths of 35 MV/m, delivered 1, 2, and 3 minutes into the recording ( $n = 13$ ).

We next consider whether the  $\sim 1\%$  changes in fluorescence observed using 6 and 2 ns pulses are consistent with a population of transient pores of nanosecond duration undergoing electrodiffusion. Pore-mediated transport of calcein was modeled using a simple electro-diffusive transport model as described previously (Sözer *et al.* 2018). Briefly, following the Nernst-Planck formalism  $J_p$ , electrodiffusive transport through a single cylindrical pore was defined as sum of two components, the diffusion term ( $J_{diffusion}$ ) and the drift term ( $J_{drift}$ ):

$$J_p = J_{\text{diffusion}} + J_{\text{drift}} \quad (\text{S3})$$

$$J_{\text{diffusion}} = \frac{\pi r_{\text{pore}}^2 D_s c}{l_{\text{pore}} + \frac{\pi r_{\text{pore}}}{2}} \quad (\text{S4})$$

where  $D_s$  is the diffusion coefficient,  $r_{\text{pore}}$  is the pore radius,  $l_{\text{pore}}$  is the length of the pore (4 nm in these calculations), and  $c$  is the concentration difference from one side of the membrane to the other. The drift term is

$$J_{\text{drift}} = \frac{1}{2} \frac{\pi r_{\text{pore}}^2 D_s c}{l_{\text{pore}}} \frac{q_e z V_m}{kT} \quad (\text{S5})$$

where  $V_m$  is the transmembrane potential, which can be estimated with equation S1 using the electric field amplitude and  $r_{\text{vesicle}}$  vesicle radius, which is 6  $\mu\text{m}$  on average in our experiments.

We assume that following electroporation, 2% of the vesicle's surface is populated by 1 nm pores ( $n_{\text{pore,fast}} = 2.9\text{e}6$ ) with a pore formation time of 0.5 ns, after which drift and diffusion processes begin. The drift lasts only as long as the duration of the pulse while diffusion continues for 50 ns. With these assumptions, we get the values in Table S2. If we assume a lower membrane potential with increasing pore numbers, we can derive, approximately, the same transport. For a continuum-based computational study on expected pore numbers for a variety of pulse durations, refer to Son et al. 2014.

Table S2 Calculations of electrodiffusion of calcein through short-lived pores

|                                                          | 6 ns, 35 MV/m, 10 p |         | 2 ns, 45 MV/m, 40 p |
|----------------------------------------------------------|---------------------|---------|---------------------|
| $V_m$ (V)                                                | 18                  | 2       | 8                   |
| $J_{\text{drift}}$ (mol/s)                               | 2.2e-17             | 2.4e-18 | 9.7e-18             |
| $J_{\text{diffusion}}$ (mol/s)                           | 1.1e-20             | 1.1e-20 | 1.1e-20             |
| $n_{\text{pore, fast}}$                                  | 2.9e6               | 2.9e7   | 2.9e6               |
| $C_{\text{intravesicular, drift, single pulse}}$ (M)     | 3.8e-7              | 4.2e-7  | 4.6e-8              |
| $C_{\text{intravesicular, diffusion, single pulse}}$ (M) | 1.7e-9              | 1.8e-8  | 1.8e-9              |
| $C_{\text{intravesicular, pulse train}}$ (M)             | 3.8e-6              | 4.4e-6  | 1.9e-6              |
| $\Delta F/F_e$                                           | 0.02                | 0.02    | 0.01                |

These calculations show that the transport of calcein we observed as an instantaneous jump following the pulse sequence can be explained by transport through electropores with  $\sim 50$  ns lifetime even when we limit the number of pores to a small fraction of the vesicle surface. The

slower kinetics (seconds) observed with 6 ns unipolar pulses are attributed to a much smaller number of longer lived pores undergoing diffusive transport alone.

For example, in the 6 ns pulse case if we replace half of the short-lived pores with only fifteen pores with a lifetime of 1 second at full transport capacity, we get approximately equal contribution of short and longer lifetime pores as listed in Table S3.

Table S3 Calculations of electrodiffusion of calcein through short-lived and longer-lived pores

|                                                   | 6 ns, 35 MV/m, 10 p |
|---------------------------------------------------|---------------------|
| $V_m$ (V)                                         | 18                  |
| $J_{drift}$ (mol/s)                               | 2.2e-17             |
| $J_{diffusion}$ (mol/s)                           | 1.1e-20             |
| $n_{pore, fast}$                                  | 1.4e6               |
| $n_{pore, slow}$                                  | 15                  |
| $C_{intravesicular, drift, single pulse}$ (M)     | 1.9e-7              |
| $C_{intravesicular, diffusion, single pulse}$ (M) | 1.9e-7              |
| $C_{intravesicular, pulse train}$ (M)             | 3.8e-6              |
| $\Delta F/F_e$                                    | 0.02                |

### Molecular dynamics simulation time course of pore annihilation

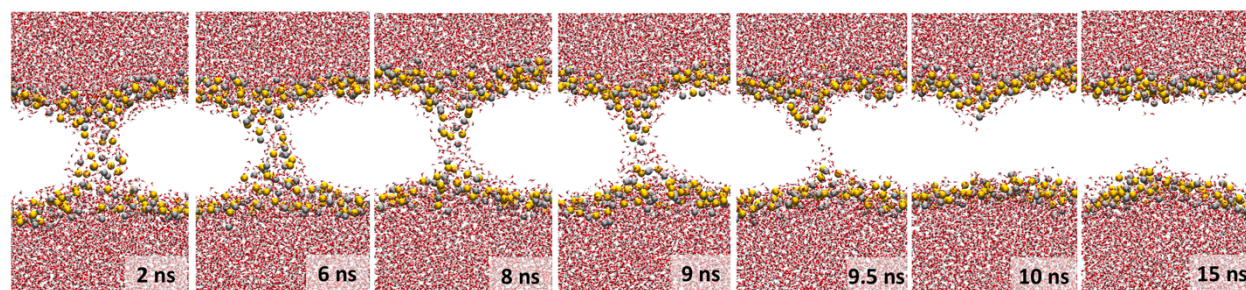

Figure S2 Snapshots of the evolution of a typical lipid electropore after removal of sustaining electric field. The pore shown is the same as the one in Figure 4b of the main manuscript (simulation plotted in red in Figure 4a, top plot). Pore collapse is complete at 10 ns for this pore. Red and white: water O and H; gold and silver: P and N of lipid head groups; lipid tails hidden for clarity.

### References

- Abidor IG, Arakelyan VB, Chernomordik LV, Chizmadzhev YA, Pastushenko VF, Tarasevich MR (1979) Electric breakdown of bilayer lipid membranes I. The main experimental facts and their qualitative discussion. *Bioelectrochemistry Bioenerg* 6:37–52.

- Fernández ML, Risk M, Reigada R, Vernier PT (2012) Size-controlled nanopores in lipid membranes with stabilizing electric fields. *Biochem Biophys Res Commun* 423:325–330.
- Mauroy C, Portet T, Winterhalder M, Bellard E, Blache M-C, Teissié J, Zumbusch A, Rols M-P (2012) Giant lipid vesicles under electric field pulses assessed by non invasive imaging. *Bioelectrochemistry* 87:253–259.
- Pauly H, Schwan HP (1959) Über die Impedanz einer Suspension von kugelförmigen Teilchen mit einer Schale. *Zeitschrift für Naturforsch - Sect B J Chem Sci* 14:125–131.
- Sengel JT, Wallace MI (2016) Imaging the dynamics of individual electropores. *Proc Natl Acad Sci* 113:5281–5286.
- Son, R.S., K.C. Smith, T.R. Gowrishankar, P.T. Vernier, and J.C. Weaver. 2014. Basic features of a cell electroporation model: illustrative behavior for two very different pulses. *J. Membr. Biol.* 247: 1209–1228.
- Sözer EB, Levine ZA, Vernier PT (2017) Quantitative limits on small molecule transport via the electropermeome measuring and modeling single nanosecond perturbations. *Sci Rep* 7:57.
- Sözer EB, Pocetti CF, Vernier PT (2018) Transport of charged small molecules after electropermeabilization - drift and diffusion. *BMC Biophys* 11:4.
- Sözer EB, Vernier PT (2019) Modulation of biological responses to 2 ns electrical stimuli by field reversal. *Biochim Biophys Acta - Biomembr* 1861:1228–1239 .
- Stewart DA, Gowrishankar IR, Weaver JC (2004) Transport lattice approach to describing cell electroporation: Use of a local asymptotic model. *IEEE Trans Plasma Sci* 32:1696–1708.
- Weinberger A, Tsai F-C, Koenderink GH, Schmidt TF, Itri R, Meier W, Schmatko T, Schröder A, Marques C (2013) Gel-Assisted Formation of Giant Unilamellar Vesicles. *Biophys J* 105:154–164 .
